# Supplementary material for: Oral Sucrosomial Iron Is as Effective as Intravenous Ferric Carboxy-Maltose in Treating Anemia in Patients with Ulcerative Colitis
Source: MDPI journal article supplement (doi:10.3390/nu13020608), 2021-02-12
Supplement: s1 [file s1]

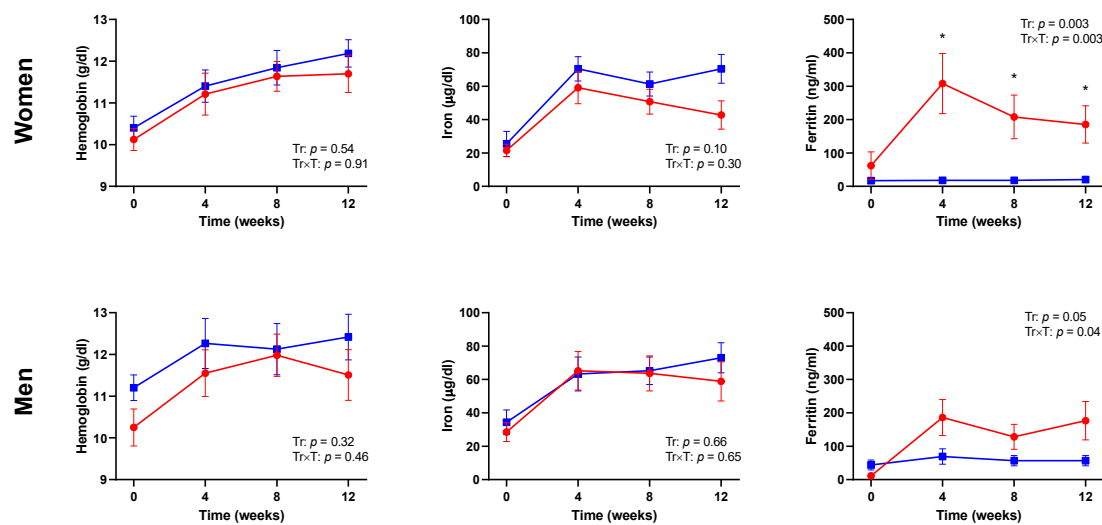

**Figure S1.** Time-trends of Hb, serum iron, and serum ferritin levels in women (top panels) and men (bottom panels) with UC treated with intravenous ferric carboxy-maltose (red lines) or oral sucrosomial® iron (blue lines).
